# Supplementary material for: Dopant driven tuning of the hydrogen oxidation mechanism at the pore/nickel/zirconia triple phase boundary
Source: Royal Society of Chemistry journal article supplement (doi:10.1039/c7cp08572a), 2018-01-01
Supplement: c7cp08572a1.pdf [file c7cp08572a1.pdf]

## SUPPLEMENTARY INFORMATION

### Dopant driven tuning of hydrogen oxidation mechanism at the pore/nickel/zirconia triple phase boundary

Albert M. Iskandarov<sup>a,b,c</sup> and Tomofumi Tada<sup>a,b</sup>

<sup>a</sup> Materials Research Center for Element Strategy, Tokyo Institute of Technology, 4259-SE-3 Nagatsuta-cho, Midori-ku, Yokohama 226-8501, Japan

<sup>b</sup> CREST, Japan Science and Technology Agency, K's Gobancho, 7, Chiyoda-ku, Tokyo 102-0076, Japan

<sup>c</sup> Institute for Metals Superplasticity Problems of the Russian Academy of Sciences, Khalturin St. 39, Ufa 450001, Russia

Email: tada.t.ae@m.titech.ac.jp

**Table S1: Energy barriers (eV) for the three HOR mechanisms at 1000K after different types of OCV correction.**

| HOR mechanism | Reaction step     | Type of OCV correction | Y    | Sc                | Al                | Ce   | Ca                | Y in bulk |
|---------------|-------------------|------------------------|------|-------------------|-------------------|------|-------------------|-----------|
| O-migration   | 1-2 <sup>a</sup>  | Any                    | 1.26 | 1.27              | 0.87              | 1.36 | 1.26 <sup>b</sup> | 1.80      |
| On-boundary   | 4-5 <sup>a</sup>  | Individual             | 1.35 | 1.23 <sup>c</sup> | 1.29 <sup>c</sup> | 1.28 | 1.85 <sup>c</sup> | 1.30      |
|               |                   | YSZ-based              | 1.35 | 1.22 <sup>c</sup> | 1.12 <sup>c</sup> | 1.26 | 1.81 <sup>c</sup> | 1.33      |
|               |                   | No                     | 1.41 | 1.28 <sup>c</sup> | 1.18 <sup>c</sup> | 1.31 | 1.87 <sup>c</sup> | 1.28      |
|               | 7-8               | Individual             | 0.90 | 1.07 <sup>c</sup> | 0.99 <sup>c</sup> | 1.10 | 1.52 <sup>c</sup> | 1.08      |
|               |                   | No                     | 0.95 | 1.12 <sup>c</sup> | 0.88 <sup>c</sup> | 1.13 | 1.54 <sup>c</sup> | 1.16      |
| H-migration   | 4-5 <sup>a</sup>  | Individual             | 1.35 | 1.17              | 1.29              | 1.22 | 1.85              | 1.30      |
|               | 9-10 <sup>a</sup> | Individual             | 1.35 | 1.17              | 1.29              | 1.22 | 1.85              | 1.30      |

<sup>a</sup> The step is rate-limiting for the corresponding HOR mechanism.

<sup>b</sup> Migration of OH occurs from the nickel surface back to zirconia, which does not allow the HOR to be completed via the O-migration mechanism.

<sup>c</sup> Dissociation of water molecule occurs at the TPB, which does not allow the HOR to be completed via the on-boundary mechanism.
